# Supplementary material for: Psychological Status of Men Who Have Sex with Men during COVID-19: An Online Cross-Sectional Study in Western China
Source: MDPI journal article supplement (doi:10.3390/ijerph20021333), 2023-01-11
Supplement: s1 [file s1]

Supplementary Table S1.

Univariate analysis of each variable

| Variables                                       |                | Higher risk of depression |             |              | Higher risk of neurasthenia |             |              | Higher risk of fear |             |              |
|-------------------------------------------------|----------------|---------------------------|-------------|--------------|-----------------------------|-------------|--------------|---------------------|-------------|--------------|
|                                                 | Total<br>n (%) | Yes<br>n (%)              | No<br>n (%) | p-value      | Yes<br>n (%)                | No<br>n (%) | p-value      | Yes<br>n (%)        | No<br>n (%) | p-value      |
| <b>Demographic characteristics <sup>a</sup></b> |                |                           |             |              |                             |             |              |                     |             |              |
| Age                                             |                |                           |             | <b>0.021</b> |                             |             | <b>0.096</b> |                     |             | 0.889        |
| 18~35                                           | 248(60.19)     | 52(74.29)                 | 196(57.31)  |              | 40(68.97)                   | 208(58.76)  |              | 41(59.42)           | 207(60.35)  |              |
| 35~50                                           | 142(34.47)     | 17(24.29)                 | 125(36.55)  |              | 18(31.03)                   | 124(35.03)  |              | 25(36.23)           | 117(34.11)  |              |
| ≥50                                             | 22(5.34)       | 1(1.43)                   | 21(6.14)    |              | 0(0.00)                     | 22(6.21)    |              | 3(4.35)             | 19(5.54)    |              |
| Household location                              |                |                           |             | 0.245        |                             |             | 0.404        |                     |             | <b>0.089</b> |
| Urban                                           | 388(94.17)     | 68(97.14)                 | 320(93.57)  |              | 56(96.55)                   | 332(93.79)  |              | 68(98.55)           | 320(93.29)  |              |
| Rural                                           | 24(5.83)       | 2(2.86)                   | 22(6.43)    |              | 2(3.45)                     | 22(6.21)    |              | 1(1.45)             | 23(6.71)    |              |
| Ethnicity                                       |                |                           |             | 0.867        |                             |             | 0.465        |                     |             | 0.508        |
| Han ethnicity                                   | 373(90.53)     | 63(90.00)                 | 310(90.64)  |              | 51(87.93)                   | 322(90.96)  |              | 61(88.41)           | 312(90.96)  |              |
| Minority                                        | 39(9.47)       | 7(10.00)                  | 32(9.36)    |              | 7(12.07)                    | 32(9.04)    |              | 8(11.59)            | 31(9.04)    |              |
| Educational level                               |                |                           |             | 0.622        |                             |             | 0.629        |                     |             | 0.108        |
| High school or below                            | 61(14.81)      | 8(11.43)                  | 53(15.50)   |              | 9(15.52)                    | 52(14.69)   |              | 15(21.74)           | 46(13.41)   |              |
| Vocational school                               | 150(36.41)     | 28(40.00)                 | 122(35.67)  |              | 24(41.38)                   | 126(35.59)  |              | 27(39.13)           | 123(35.86)  |              |
| College or above                                | 201(48.79)     | 34(48.57)                 | 167(48.83)  |              | 25(43.10)                   | 176(49.72)  |              | 27(39.13)           | 174(50.73)  |              |
| Employment status                               |                |                           |             | 0.845        |                             |             | 0.306        |                     |             | 0.423        |
| Employed                                        | 315(74.29)     | 52(74.29)                 | 263(76.90)  |              | 42(72.41)                   | 273(77.12)  |              | 49(71.01)           | 266(77.55)  |              |
| Unemployed/Retirement                           | 73(17.72)      | 13(18.57)                 | 60(17.54)   |              | 14(24.14)                   | 59(16.67)   |              | 16(23.19)           | 57(16.62)   |              |
| Student                                         | 24(5.83)       | 5(7.14)                   | 19(5.56)    |              | 2(3.45)                     | 22(6.21)    |              | 4(5.80)             | 20(5.83)    |              |
| Marital status                                  |                |                           |             | <b>0.050</b> |                             |             | <b>0.081</b> |                     |             | 0.890        |
| Married                                         | 68(16.50)      | 6(8.57)                   | 62(18.13)   |              | 5(8.62)                     | 63(17.80)   |              | 11(15.94)           | 57(16.62)   |              |
| Unmarried                                       | 344(83.50)     | 64(91.43)                 | 280(81.87)  |              | 53(91.38)                   | 291(82.20)  |              | 58(84.06)           | 286(83.38)  |              |
| Monthly personal income                         |                |                           |             | 0.878        |                             |             | 0.576        |                     |             | 0.430        |
| 1000~5000 RMB                                   | 201(48.79)     | 36(51.43)                 | 165(48.25)  |              | 32(55.17)                   | 169(47.74)  |              | 38(55.07)           | 163(47.52)  |              |
| 5000~10000 RMB                                  | 139(33.74)     | 22(31.43)                 | 117(34.21)  |              | 17(29.31)                   | 122(34.46)  |              | 22(31.88)           | 117(34.11)  |              |
| ≥10000 RMB                                      | 72(17.48)      | 12(17.14)                 | 60(17.54)   |              | 9(15.52)                    | 63(17.80)   |              | 9(13.04)            | 63(18.37)   |              |

|                                                              |            |           |            |              |           |            |              |           |            |              |
|--------------------------------------------------------------|------------|-----------|------------|--------------|-----------|------------|--------------|-----------|------------|--------------|
| <b>HIV-related characteristics <sup>a</sup></b>              |            |           |            |              |           |            |              |           |            |              |
| Sexual role                                                  |            |           |            | <b>0.077</b> |           |            | 0.381        |           |            | 0.330        |
| Mainly “Top”                                                 | 182(44.17) | 29(41.43) | 153(44.74) |              | 22(37.93) | 160(45.20) |              | 31(44.93) | 151(44.02) |              |
| Both of it                                                   | 72(17.48)  | 7(10.00)  | 65(19.01)  |              | 9(15.52)  | 63(17.80)  |              | 8(11.59)  | 64(18.66)  |              |
| Mainly “Bottom”                                              | 158(38.35) | 34(48.57) | 124(36.26) |              | 27(46.55) | 131(37.01) |              | 30(43.48) | 128(37.32) |              |
| Number of male sexual partners in the last month             |            |           |            | 0.146        |           |            | <b>0.048</b> |           |            | 0.966        |
| 0                                                            | 227(55.10) | 46(65.71) | 181(52.92) |              | 40(68.97) | 187(52.82) |              | 39(56.52) | 188(54.81) |              |
| 1                                                            | 123(29.85) | 16(22.86) | 107(31.29) |              | 14(24.14) | 109(30.79) |              | 20(28.99) | 103(30.03) |              |
| ≥2                                                           | 62(15.05)  | 8(11.43)  | 54(15.79)  |              | 4(6.90)   | 58(16.38)  |              | 10(14.49) | 52(15.16)  |              |
| Self-reported HIV infection status                           |            |           |            | 0.263        |           |            | 0.429        |           |            | 0.273        |
| Positive                                                     | 38(9.22)   | 10(2.43)  | 28(8.19)   |              | 8(13.79)  | 30(8.47)   |              | 9(13.04)  | 29(8.45)   |              |
| Negative                                                     | 358(86.89) | 57(81.43) | 301(88.01) |              | 48(82.76) | 310(87.57) |              | 59(85.51) | 299(87.17) |              |
| Unknown                                                      | 16(3.88)   | 3(4.29)   | 13(3.80)   |              | 2(3.45)   | 14(3.95)   |              | 1(1.45)   | 15(4.37)   |              |
| <b>COVID-19 related knowledge <sup>b</sup></b>               |            |           |            |              |           |            |              |           |            |              |
| I am well informed about the causes of COVID-19              |            |           |            | <b>0.064</b> |           |            | 0.155        |           |            | 0.288        |
| Totally disagree                                             | 21(5.10)   | 7(10.00)  | 14(4.09)   |              | 8(13.79)  | 13(3.67)   |              | 8(11.59)  | 13(3.79)   |              |
| Not quite agree                                              | 40(9.71)   | 13(18.57) | 27(7.89)   |              | 8(13.79)  | 32(9.04)   |              | 8(11.59)  | 32(9.33)   |              |
| Average                                                      | 135(32.77) | 17(24.29) | 118(34.50) |              | 11(18.97) | 124(35.03) |              | 17(24.64) | 118(34.40) |              |
| Quite agree                                                  | 131(31.80) | 17(24.29) | 114(33.33) |              | 18(31.03) | 113(31.92) |              | 20(28.99) | 111(32.36) |              |
| Totally agree                                                | 85(20.63)  | 26(22.86) | 69(20.18)  |              | 13(22.41) | 72(20.34)  |              | 16(23.19) | 69(20.12)  |              |
| I am well informed about the transmission routes of COVID-19 |            |           |            | 0.388        |           |            | 0.499        |           |            | 0.254        |
| Totally disagree                                             | 4(0.97)    | 2(2.86)   | 2(0.58)    |              | 2(3.45)   | 2(0.56)    |              | 2(2.90)   | 2(0.58)    |              |
| Not quite agree                                              | 6(1.46)    | 3(4.29)   | 3(0.88)    |              | 2(3.45)   | 4(1.13)    |              | 1(1.45)   | 5(1.46)    |              |
| Average                                                      | 57(13.83)  | 9(12.86)  | 48(14.04)  |              | 5(8.62)   | 52(14.69)  |              | 4(5.80)   | 53(14.45)  |              |
| Quite agree                                                  | 180(43.69) | 26(37.14) | 154(45.03) |              | 26(44.83) | 154(43.50) |              | 29(42.03) | 151(44.02) |              |
| Totally agree                                                | 165(40.05) | 30(42.86) | 135(39.47) |              | 23(39.66) | 142(40.11) |              | 33(47.83) | 132(38.48) |              |
| I am well informed about the infectiousness of COVID-19      |            |           |            | 0.781        |           |            | 0.605        |           |            | <b>0.081</b> |
| Totally disagree                                             | 5(1.21)    | 2(2.86)   | 3(0.88)    |              | 2(3.45)   | 3(0.85)    |              | 2(2.90)   | 3(0.87)    |              |

|                                                                                |            |           |            |       |           |            |                  |           |            |              |
|--------------------------------------------------------------------------------|------------|-----------|------------|-------|-----------|------------|------------------|-----------|------------|--------------|
| Not quite agree                                                                | 6(1.46)    | 1(1.43)   | 5(1.46)    |       | 1(1.72)   | 5(1.41)    |                  | 1(1.45)   | 5(1.46)    |              |
| Average                                                                        | 61(14.84)  | 9(12.86)  | 52(15.20)  |       | 7(12.07)  | 54(15.25)  |                  | 7(10.14)  | 54(15.74)  |              |
| Quite agree                                                                    | 174(42.23) | 26(37.14) | 148(43.27) |       | 19(32.76) | 155(43.97) |                  | 20(28.99) | 154(44.90) |              |
| Totally agree                                                                  | 166(40.29) | 32(45.71) | 134(39.18) |       | 29(50.00) | 137(38.70) |                  | 39(56.52) | 127(37.03) |              |
| I am well informed about the effectiveness of preventive measures for COVID-19 |            |           |            | 0.943 |           |            | 0.246            |           |            | 0.947        |
| Totally disagree                                                               | 4(0.97)    | 2(2.86)   | 2(0.58)    |       | 2(3.45)   | 2(0.56)    |                  | 2(2.90)   | 2(0.58)    |              |
| Not quite agree                                                                | 3(0.73)    | 1(1.43)   | 2(0.58)    |       | 1(1.72)   | 2(0.56)    |                  | 1(1.45)   | 2(0.58)    |              |
| Average                                                                        | 63(15.29)  | 10(14.29) | 53(15.50)  |       | 10(17.24) | 53(14.97)  |                  | 11(15.94) | 52(15.16)  |              |
| Quite agree                                                                    | 187(45.39) | 26(37.14) | 161(47.08) |       | 23(39.66) | 164(46.33) |                  | 24(34.78) | 163(47.52) |              |
| Totally agree                                                                  | 155(37.62) | 31(44.29) | 124(36.26) |       | 22(37.93) | 133(37.57) |                  | 31(44.93) | 124(36.15) |              |
| I am well informed about the effectiveness of cure of COVID-19                 |            |           |            | 0.327 |           |            | <b>&lt;0.001</b> |           |            | <b>0.040</b> |
| Totally disagree                                                               | 18(4.37)   | 9(12.86)  | 9(2.63)    |       | 10(17.24) | 8(2.26)    |                  | 8(11.59)  | 10(2.92)   |              |
| Not quite agree                                                                | 32(7.77)   | 7(10.00)  | 25(7.31)   |       | 7(12.07)  | 25(7.06)   |                  | 5(7.25)   | 27(7.87)   |              |
| Average                                                                        | 141(34.22) | 16(22.86) | 125(36.55) |       | 17(29.31) | 124(35.03) |                  | 24(34.78) | 117(34.11) |              |
| Quite agree                                                                    | 134(32.52) | 18(25.71) | 116(33.92) |       | 12(20.69) | 122(34.46) |                  | 19(27.54) | 115(33.53) |              |
| Totally agree                                                                  | 87(21.12)  | 20(28.57) | 67(19.59)  |       | 12(20.69) | 75(21.19)  |                  | 13(18.84) | 74(21.57)  |              |
| I am well informed about the reinfection of COVID-19 after cure                |            |           |            | 0.359 |           |            | <b>0.095</b>     |           |            | 0.287        |
| Totally disagree                                                               | 16(3.88)   | 6(8.57)   | 10(2.92)   |       | 6(10.34)  | 10(2.82)   |                  | 5(7.25)   | 11(3.21)   |              |
| Not quite agree                                                                | 42(10.19)  | 8(11.43)  | 34(9.94)   |       | 12(20.69) | 30(8.47)   |                  | 9(13.04)  | 33(9.62)   |              |
| Average                                                                        | 165(40.05) | 16(22.86) | 149(43.57) |       | 15(25.86) | 150(42.37) |                  | 26(37.68) | 139(40.52) |              |
| Quite agree                                                                    | 111(26.94) | 20(28.57) | 91(26.61)  |       | 11(18.97) | 100(28.25) |                  | 15(21.74) | 96(27.99)  |              |
| Totally agree                                                                  | 78(18.93)  | 20(28.57) | 58(16.96)  |       | 14(24.14) | 64(18.08)  |                  | 14(20.29) | 64(18.66)  |              |
| <b>COVID-19 related attitudes <sup>b</sup></b>                                 |            |           |            |       |           |            |                  |           |            |              |
| I think COVID-19 is very contagious                                            |            |           |            | 0.567 |           |            | 0.984            |           |            | <b>0.014</b> |
| Totally disagree                                                               | 3(0.73)    | 1(1.43)   | 2(0.58)    |       | 1(1.72)   | 2(0.56)    |                  | 1(1.45)   | 2(0.58)    |              |
| Not quite agree                                                                | 3(0.73)    | 0(0.00)   | 3(0.88)    |       | 0(0.00)   | 3(0.85)    |                  | 0(0.00)   | 3(0.87)    |              |
| Average                                                                        | 17(4.13)   | 3(4.29)   | 14(4.09)   |       | 3(5.17)   | 14(3.95)   |                  | 0(0.00)   | 17(4.96)   |              |
| Quite agree                                                                    | 58(14.08)  | 12(17.14) | 46(13.45)  |       | 6(10.34)  | 52(14.69)  |                  | 3(4.35)   | 55(16.03)  |              |
| Totally agree                                                                  | 331(80.34) | 54(77.14) | 277(80.99) |       | 48(82.76) | 283(79.94) |                  | 65(94.20) | 266(77.55) |              |

|                                                          |            |           |            |              |           |            |              |           |            |                  |
|----------------------------------------------------------|------------|-----------|------------|--------------|-----------|------------|--------------|-----------|------------|------------------|
| I think COVID-19 is very prevalent where I live          |            |           |            | 0.213        |           |            | 0.110        |           |            | 0.215            |
| Totally disagree                                         | 77(18.69)  | 15(21.43) | 62(18.13)  |              | 12(20.69) | 65(18.36)  |              | 13(18.84) | 64(18.66)  |                  |
| Not quite agree                                          | 105(25.49) | 10(14.29) | 95(27.78)  |              | 7(12.07)  | 98(27.68)  |              | 16(23.19) | 89(25.95)  |                  |
| Average                                                  | 105(25.49) | 21(30.00) | 84(24.56)  |              | 17(29.31) | 88(24.86)  |              | 14(20.29) | 91(26.53)  |                  |
| Quite agree                                              | 44(10.68)  | 4(5.71)   | 40(11.70)  |              | 5(8.62)   | 39(11.02)  |              | 6(8.70)   | 38(11.08)  |                  |
| Totally agree                                            | 81(19.66)  | 20(28.57) | 61(17.84)  |              | 17(29.31) | 64(18.08)  |              | 20(28.99) | 61(17.78)  |                  |
| I am afraid of COVID-19                                  |            |           |            | <b>0.014</b> |           |            | <b>0.029</b> |           |            | <b>&lt;0.001</b> |
| Totally disagree                                         | 42(10.19)  | 4(5.71)   | 38(11.11)  |              | 4(6.90)   | 38(10.73)  |              | 3(4.35)   | 39(11.37)  |                  |
| Not quite agree                                          | 52(12.62)  | 6(8.57)   | 46(13.45)  |              | 6(10.34)  | 46(12.99)  |              | 3(4.35)   | 49(14.29)  |                  |
| Average                                                  | 174(42.23) | 27(38.57) | 147(42.98) |              | 20(34.48) | 154(43.50) |              | 21(30.43) | 153(44.61) |                  |
| Quite agree                                              | 74(17.96)  | 17(24.29) | 57(16.67)  |              | 13(22.41) | 61(17.23)  |              | 17(24.64) | 57(16.62)  |                  |
| Totally agree                                            | 70(16.99)  | 16(22.86) | 54(15.79)  |              | 15(25.86) | 55(15.54)  |              | 25(36.23) | 45(13.12)  |                  |
| I think COVID-19 is very close to me                     |            |           |            | <b>0.013</b> |           |            | <b>0.030</b> |           |            | <b>&lt;0.001</b> |
| Totally disagree                                         | 19(4.61)   | 1(1.43)   | 18(5.26)   |              | 0(0.00)   | 19(5.37)   |              | 1(1.45)   | 18(5.25)   |                  |
| Not quite agree                                          | 41(9.95)   | 4(5.71)   | 37(10.82)  |              | 4(6.90)   | 37(10.45)  |              | 2(2.90)   | 39(11.37)  |                  |
| Average                                                  | 142(34.47) | 21(30.00) | 121(35.38) |              | 19(32.76) | 123(34.75) |              | 15(21.74) | 127(37.03) |                  |
| Quite agree                                              | 106(25.73) | 21(30.00) | 85(24.85)  |              | 16(27.59) | 90(25.42)  |              | 21(30.43) | 85(24.78)  |                  |
| Totally agree                                            | 104(25.24) | 23(32.86) | 81(23.68)  |              | 19(32.76) | 85(24.01)  |              | 30(43.48) | 74(21.57)  |                  |
| I felt nervous when I went out during the outbreak       |            |           |            | <b>0.002</b> |           |            | <b>0.016</b> |           |            | <b>&lt;0.001</b> |
| Totally disagree                                         | 74(17.96)  | 8(11.43)  | 66(19.30)  |              | 7(12.07)  | 67(18.93)  |              | 6(8.70)   | 68(19.83)  |                  |
| Not quite agree                                          | 108(26.21) | 15(21.43) | 93(27.19)  |              | 13(22.41) | 95(26.84)  |              | 12(17.39) | 96(27.99)  |                  |
| Average                                                  | 153(37.14) | 25(35.71) | 128(37.43) |              | 21(36.21) | 132(37.29) |              | 23(33.33) | 130(37.90) |                  |
| Quite agree                                              | 43(10.44)  | 11(15.71) | 32(9.36)   |              | 8(13.79)  | 35(9.89)   |              | 15(21.74) | 28(8.16)   |                  |
| Totally agree                                            | 34(8.25)   | 11(15.71) | 23(6.73)   |              | 9(15.52)  | 25(7.06)   |              | 13(18.84) | 21(6.12)   |                  |
| The outbreak is considered to be under effective control |            |           |            | <b>0.011</b> |           |            | <b>0.027</b> |           |            | 0.336            |
| Totally disagree                                         | 7(1.70)    | 3(4.29)   | 4(1.17)    |              | 4(6.90)   | 3(0.85)    |              | 3(4.35)   | 4(1.17)    |                  |
| Not quite agree                                          | 12(2.91)   | 2(2.86)   | 10(2.92)   |              | 2(3.45)   | 10(2.82)   |              | 4(5.80)   | 8(2.33)    |                  |
| Average                                                  | 63(134)    | 15(21.43) | 48(14.04)  |              | 11(18.97) | 52(14.69)  |              | 7(10.14)  | 56(16.33)  |                  |
| Quite agree                                              | 134(32.52) | 25(35.71) | 109(31.87) |              | 16(27.59) | 118(33.33) |              | 23(33.33) | 111(32.36) |                  |

|                                                                  |            |           |            |              |           |            |              |           |            |                  |
|------------------------------------------------------------------|------------|-----------|------------|--------------|-----------|------------|--------------|-----------|------------|------------------|
| Totally agree                                                    | 196(47.57) | 25(35.71) | 171(50.00) |              | 25(43.10) | 171(48.31) |              | 32(46.38) | 164(47.81) |                  |
| I think there will be another small epidemic                     |            |           |            | <b>0.003</b> |           |            | <b>0.019</b> |           |            | <b>0.020</b>     |
| Totally disagree                                                 | 18(4.37)   | 3(4.29)   | 15(4.39)   |              | 3(5.17)   | 15(4.24)   |              | 4(5.80)   | 14(4.08)   |                  |
| Not quite agree                                                  | 57(13.83)  | 7(10.00)  | 50(14.62)  |              | 6(10.34)  | 51(14.41)  |              | 6(8.70)   | 51(14.87)  |                  |
| Average                                                          | 96(23.30)  | 9(12.86)  | 87(25.44)  |              | 7(12.07)  | 89(35.14)  |              | 11(15.94) | 85(24.78)  |                  |
| Quite agree                                                      | 138(33.50) | 21(30.00) | 117(34.21) |              | 18(31.03) | 120(33.90) |              | 20(28.99) | 118(34.40) |                  |
| Totally agree                                                    | 103(25.00) | 30(42.86) | 73(21.35)  |              | 24(41.38) | 79(22.32)  |              | 28(40.58) | 75(21.87)  |                  |
| I think the outbreak will cause me financial losses              |            |           |            | <b>0.040</b> |           |            | <b>0.007</b> |           |            | <b>0.007</b>     |
| Totally disagree                                                 | 8(1.94)    | 2(2.86)   | 6(1.75)    |              | 2(3.45)   | 6(1.69)    |              | 2(2.90)   | 6(1.75)    |                  |
| Not quite agree                                                  | 25(6.07)   | 3(4.29)   | 22(6.43)   |              | 2(3.45)   | 23(6.50)   |              | 2(2.90)   | 23(6.71)   |                  |
| Average                                                          | 82(19.90)  | 8(11.43)  | 74(21.64)  |              | 5(8.62)   | 77(21.75)  |              | 8(11.59)  | 74(21.57)  |                  |
| Quite agree                                                      | 91(22.09)  | 12(17.14) | 79(23.10)  |              | 7(12.07)  | 84(23.73)  |              | 9(13.04)  | 82(23.91)  |                  |
| Totally agree                                                    | 206(50.00) | 45(64.29) | 161(47.08) |              | 42(72.41) | 164(46.33) |              | 48(69.57) | 158(46.06) |                  |
| I think COVID-19 can be cured                                    |            |           |            | 0.674        |           |            | <b>0.089</b> |           |            | 0.301            |
| Totally disagree                                                 | 14(3.40)   | 4(5.71)   | 10(2.92)   |              | 6(10.34)  | 8(2.26)    |              | 4(5.80)   | 10(2.92)   |                  |
| Not quite agree                                                  | 16(3.88)   | 3(4.29)   | 13(3.80)   |              | 2(3.45)   | 14(3.95)   |              | 3(4.35)   | 13(3.79)   |                  |
| Average                                                          | 68(16.50)  | 9(12.86)  | 59(17.25)  |              | 8(13.79)  | 60(16.95)  |              | 11(15.94) | 57(16.62)  |                  |
| Quite agree                                                      | 111(26.94) | 20(28.57) | 91(26.61)  |              | 16(27.59) | 95(26.84)  |              | 20(28.99) | 91(26.53)  |                  |
| Totally agree                                                    | 203(49.27) | 34(48.57) | 169(49.42) |              | 26(44.83) | 177(50.00) |              | 31(44.93) | 172(50.15) |                  |
| I think it is possible to be reinfected after COVID-19 is cured  |            |           |            | <b>0.015</b> |           |            | 0.240        |           |            | <b>0.051</b>     |
| Totally disagree                                                 | 14(3.40)   | 1(1.43)   | 13(3.80)   |              | 2(3.45)   | 12(3.39)   |              | 2(2.90)   | 12(3.50)   |                  |
| Not quite agree                                                  | 35(8.50)   | 5(7.14)   | 30(8.77)   |              | 8(13.79)  | 27(7.63)   |              | 6(8.70)   | 29(8.45)   |                  |
| Average                                                          | 88(21.36)  | 9(12.86)  | 79(23.10)  |              | 6(10.34)  | 82(23.16)  |              | 8(11.59)  | 80(23.32)  |                  |
| Quite agree                                                      | 119(28.88) | 20(28.57) | 99(28.95)  |              | 11(18.97) | 108(30.51) |              | 18(26.09) | 101(29.45) |                  |
| Totally agree                                                    | 156(37.86) | 35(50.00) | 121(35.38) |              | 31(53.45) | 125(35.31) |              | 35(50.72) | 121(35.28) |                  |
| If I get infected, I will not be able to handle daily activities |            |           |            | <b>0.100</b> |           |            | <b>0.034</b> |           |            | <b>&lt;0.001</b> |
| Totally disagree                                                 | 59(14.32)  | 7(10.00)  | 52(15.20)  |              | 7(12.07)  | 52(14.69)  |              | 6(8.70)   | 53(15.45)  |                  |
| Not quite agree                                                  | 91(22.09)  | 17(24.29) | 74(21.64)  |              | 12(20.69) | 79(22.32)  |              | 10(14.49) | 81(23.62)  |                  |

|                                                                                                  |            |           |            |              |           |            |                  |           |            |                  |
|--------------------------------------------------------------------------------------------------|------------|-----------|------------|--------------|-----------|------------|------------------|-----------|------------|------------------|
| Average                                                                                          | 98(23.79)  | 14(20.00) | 84(24.56)  |              | 9(15.52)  | 89(25.14)  |                  | 12(17.39) | 86(25.07)  |                  |
| Quite agree                                                                                      | 72(17.48)  | 8(11.43)  | 64(18.71)  |              | 7(12.07)  | 65(18.36)  |                  | 10(14.49) | 62(18.08)  |                  |
| Totally agree                                                                                    | 92(22.33)  | 24(34.29) | 68(19.88)  |              | 23(39.66) | 69(19.49)  |                  | 31(44.93) | 61(17.78)  |                  |
| I am very worried about another outbreak                                                         |            |           |            | <b>0.013</b> |           |            | <b>&lt;0.001</b> |           |            | <b>&lt;0.001</b> |
| Totally disagree                                                                                 | 16(3.88)   | 2(2.86)   | 14(4.09)   |              | 1(1.72)   | 15(4.24)   |                  | 1(1.45)   | 15(4.37)   |                  |
| Not quite agree                                                                                  | 36(8.74)   | 2(2.86)   | 34(9.94)   |              | 1(1.72)   | 35(9.89)   |                  | 1(1.45)   | 35(10.20)  |                  |
| Average                                                                                          | 107(25.97) | 15(21.43) | 92(26.90)  |              | 9(15.52)  | 98(27.68)  |                  | 8(11.59)  | 99(28.86)  |                  |
| Quite agree                                                                                      | 95(23.06)  | 16(22.86) | 79(23.10)  |              | 14(24.14) | 81(22.88)  |                  | 14(20.29) | 81(23.62)  |                  |
| Totally agree                                                                                    | 158(38.35) | 35(50.00) | 123(35.96) |              | 33(56.90) | 125(35.31) |                  | 45(65.22) | 113(32.94) |                  |
| <b>COVID-19 related behavior <sup>a</sup></b>                                                    |            |           |            |              |           |            |                  |           |            |                  |
| Had a COVID-19 test                                                                              |            |           |            | 0.937        |           |            | 0.617            |           |            | 0.851            |
| Yes                                                                                              | 81(19.66)  | 14(20.00) | 67(19.59)  |              | 10(17.24) | 71(20.06)  |                  | 13(18.84) | 68(19.83)  |                  |
| No                                                                                               | 331(80.34) | 56(80.00) | 275(80.41) |              | 48(82.76) | 283(79.94) |                  | 56(81.16) | 275(80.17) |                  |
| <b>Risk perception</b>                                                                           |            |           |            |              |           |            |                  |           |            |                  |
| <b>Controllability <sup>b</sup></b>                                                              |            |           |            |              |           |            |                  |           |            |                  |
| I can take protective measures such as home isolation, wearing masks and washing hands regularly |            |           |            | <b>0.057</b> |           |            | 0.219            |           |            | 0.839            |
| Totally disagree                                                                                 | 0(0.00)    | 0(0.00)   | 0(0.00)    |              | 0(0.00)   | 0(0.00)    |                  | 0(0.00)   | 0(0.00)    |                  |
| Not quite agree                                                                                  | 2(0.49)    | 1(1.43)   | 1(0.29)    |              | 1(1.72)   | 1(0.28)    |                  | 1(1.45)   | 1(0.29)    |                  |
| Average                                                                                          | 27(6.55)   | 6(8.57)   | 21(6.14)   |              | 3(5.17)   | 24(6.78)   |                  | 4(5.80)   | 23(6.71)   |                  |
| Quite agree                                                                                      | 59(14.32)  | 14(20.00) | 45(13.16)  |              | 13(22.41) | 46(12.99)  |                  | 8(11.59)  | 51(14.87)  |                  |
| Totally agree                                                                                    | 324(78.64) | 49(70.00) | 275(80.41) |              | 41(70.69) | 283(79.94) |                  | 56(81.16) | 268(78.13) |                  |
| I can ensure that I am not infected with COVID-19                                                |            |           |            | 0.324        |           |            | 0.151            |           |            | 0.200            |
| Totally disagree                                                                                 | 0(0.00)    | 0(0.00)   | 0(0.00)    |              | 0(0.00)   | 0(0.00)    |                  | 0(0.00)   | 0(0.00)    |                  |
| Not quite agree                                                                                  | 8(1.94)    | 2(2.86)   | 6(1.75)    |              | 2(3.45)   | 6(1.69)    |                  | 4(5.80)   | 4(1.17)    |                  |
| Average                                                                                          | 69(16.75)  | 15(21.43) | 54(15.79)  |              | 13(22.41) | 56(15.82)  |                  | 14(20.29) | 55(16.03)  |                  |
| Quite agree                                                                                      | 150(36.41) | 23(32.86) | 127(37.13) |              | 20(34.48) | 130(36.72) |                  | 20(28.99) | 130(37.90) |                  |
| Totally agree                                                                                    | 185(44.90) | 30(42.86) | 155(45.32) |              | 23(39.66) | 162(45.76) |                  | 31(44.93) | 154(44.90) |                  |
| I can control the loss caused by COVID-19                                                        |            |           |            | 0.465        |           |            | <b>0.002</b>     |           |            | 0.127            |
| Totally disagree                                                                                 | 0(0.00)    | 0(0.00)   | 0(0.00)    |              | 0(0.00)   | 0(0.00)    |                  | 0(0.00)   | 0(0.00)    |                  |

|                                               |            |           |            |       |           |            |       |           |            |       |
|-----------------------------------------------|------------|-----------|------------|-------|-----------|------------|-------|-----------|------------|-------|
| Not quite agree                               | 51(12.83)  | 11(15.71) | 40(11.70)  |       | 12(20.69) | 39(11.02)  |       | 12(17.39) | 39(11.37)  |       |
| Average                                       | 223(54.13) | 40(57.14) | 183(53.51) |       | 36(62.07) | 187(52.82) |       | 39(56.52) | 184(53.64) |       |
| Quite agree                                   | 59(14.32)  | 4(5.71)   | 55(16.08)  |       | 5(8.62)   | 54(15.25)  |       | 7(10.14)  | 52(15.16)  |       |
| Totally agree                                 | 79(19.17)  | 15(21.43) | 64(18.71)  |       | 5(8.62)   | 74(20.90)  |       | 11(15.94) | 68(19.83)  |       |
| Possibility <sup>b</sup>                      |            |           |            |       |           |            |       |           |            |       |
| I'm very likely to get infected with COVID-19 |            |           |            | 0.685 |           |            | 0.544 |           |            | 0.696 |
| Totally disagree                              | 0(0.00)    | 0(0.00)   | 0(0.00)    |       | 0(0.00)   | 0(0.00)    |       | 0(0.00)   | 0(0.00)    |       |
| Not quite agree                               | 193(46.84) | 32(45.71) | 161(47.08) |       | 29(50.00) | 164(46.33) |       | 31(44.93) | 162(47.23) |       |
| Average                                       | 135(32.77) | 23(32.86) | 112(32.75) |       | 19(32.76) | 116(32.77) |       | 24(34.78) | 111(32.26) |       |
| Quite agree                                   | 29(7.04)   | 4(5.71)   | 25(7.31)   |       | 3(5.17)   | 26(7.34)   |       | 3(4.35)   | 26(7.58)   |       |
| Totally agree                                 | 55(13.35)  | 11(15.71) | 44(12.87)  |       | 7(12.07)  | 48(13.56)  |       | 11(15.94) | 44(12.83)  |       |
| Susceptibility <sup>b</sup>                   |            |           |            |       |           |            |       |           |            |       |
| I am more likely than others to get COVID-19  |            |           |            | 0.015 |           |            | 0.018 |           |            | 0.003 |
| Totally disagree                              | 73(17.72)  | 9(12.86)  | 64(18.71)  |       | 8(13.79)  | 65(18.36)  |       | 9(13.04)  | 64(18.66)  |       |
| Not quite agree                               | 146(35.44) | 19(27.14) | 127(37.13) |       | 15(25.86) | 131(37.01) |       | 18(26.09) | 128(37.32) |       |
| Average                                       | 136(33.01) | 26(37.14) | 110(32.16) |       | 22(37.93) | 114(32.20) |       | 24(34.78) | 112(32.65) |       |
| Quite agree                                   | 28(6.80)   | 10(14.29) | 18(5.26)   |       | 6(10.34)  | 22(6.21)   |       | 10(14.49) | 18(5.25)   |       |
| Totally agree                                 | 29(7.04)   | 6(8.57)   | 23(6.73)   |       | 7(12.07)  | 22(6.21)   |       | 8(11.59)  | 21(6.12)   |       |
| Severity <sup>b</sup>                         |            |           |            |       |           |            |       |           |            |       |
| I think COVID-19 is very serious              |            |           |            | 0.380 |           |            | 0.429 |           |            | 0.036 |
| Totally disagree                              | 5(1.21)    | 1(1.43)   | 4(1.17)    |       | 1(1.72)   | 4(1.13)    |       | 1(1.45)   | 4(1.17)    |       |
| Not quite agree                               | 6(1.46)    | 2(2.86)   | 4(1.17)    |       | 2(3.45)   | 4(1.13)    |       | 1(1.45)   | 5(1.46)    |       |
| Average                                       | 39(9.47)   | 9(12.86)  | 30(8.77)   |       | 9(15.52)  | 30(8.47)   |       | 6(8.70)   | 33(9.62)   |       |
| Quite agree                                   | 93(22.57)  | 13(18.57) | 80(23.39)  |       | 6(10.34)  | 87(24.58)  |       | 3(4.35)   | 90(26.24)  |       |
| Totally agree                                 | 269(65.29) | 45(64.29) | 224(65.50) |       | 40(68.97) | 229(64.69) |       | 58(84.06) | 211(61.52) |       |
| Epidemic exposure <sup>a</sup>                |            |           |            | 0.001 |           |            | 0.007 |           |            | 0.018 |
| Yes                                           | 209(50.73) | 48(68.57) | 161(47.08) |       | 39(67.24) | 184(51.98) |       | 44(63.77) | 165(48.10) |       |
| No                                            | 203(49.27) | 22(31.43) | 181(52.92) |       | 19(32.76) | 170(48.02) |       | 25(36.23) | 178(51.90) |       |
| Continued                                     |            |           |            |       |           |            |       |           |            |       |

| Variables                                       |                | Higher risk of anxiety |             |              | Higher risk of hypochondria |             |         |  |  |  |
|-------------------------------------------------|----------------|------------------------|-------------|--------------|-----------------------------|-------------|---------|--|--|--|
|                                                 | Total<br>n (%) | Yes<br>n (%)           | No<br>n (%) | p-value      | Yes<br>n (%)                | No<br>n (%) | p-value |  |  |  |
| <b>Demographic characteristics <sup>a</sup></b> |                |                        |             |              |                             |             |         |  |  |  |
| Age                                             |                |                        |             | <b>0.074</b> |                             |             | 0.203   |  |  |  |
| 18~35                                           | 248(60.19)     | 46(67.65)              | 202(58.72)  |              | 49(65.33)                   | 199(59.05)  |         |  |  |  |
| 35~50                                           | 142(34.47)     | 22(32.35)              | 120(34.88)  |              | 25(33.33)                   | 117(34.72)  |         |  |  |  |
| ≥50                                             | 22(5.34)       | 0(0.00)                | 22(6.40)    |              | 1(1.33)                     | 21(6.23)    |         |  |  |  |
| Household location                              |                |                        |             | <b>0.093</b> |                             |             | 0.456   |  |  |  |
| Urban                                           | 388(94.17)     | 67(98.53)              | 321(93.31)  |              | 72(96.00)                   | 316(93.77)  |         |  |  |  |
| Rural                                           | 24(5.83)       | 1(1.47)                | 23(6.69)    |              | 3(4.00)                     | 21(6.23)    |         |  |  |  |
| Ethnicity                                       |                |                        |             | 0.515        |                             |             | 0.965   |  |  |  |
| Han ethnicity                                   | 373(90.53)     | 63(92.65)              | 310(90.12)  |              | 68(90.67)                   | 305(90.50)  |         |  |  |  |
| Minority                                        | 39(9.47)       | 5(7.35)                | 34(9.88)    |              | 7(9.33)                     | 32(9.50)    |         |  |  |  |
| Educational level                               |                |                        |             | 0.868        |                             |             | 0.805   |  |  |  |
| High school or below                            | 61(14.81)      | 9(13.24)               | 52(15.12)   |              | 11(14.67)                   | 50(14.84)   |         |  |  |  |
| Vocational school                               | 150(36.41)     | 24(35.29)              | 126(36.63)  |              | 25(33.33)                   | 125(37.09)  |         |  |  |  |
| College or above                                | 201(48.79)     | 35(51.47)              | 166(48.26)  |              | 39(52.00)                   | 162(48.07)  |         |  |  |  |
| Employment status                               |                |                        |             | 0.368        |                             |             | 0.674   |  |  |  |
| Employed                                        | 315(74.29)     | 48(70.59)              | 267(77.62)  |              | 56(74.67)                   | 259(76.85)  |         |  |  |  |
| Unemployed/Retirement                           | 73(17.72)      | 14(20.59)              | 59(17.15)   |              | 13(17.33)                   | 60(17.80)   |         |  |  |  |
| Student                                         | 24(5.83)       | 6(8.82)                | 218(5.23)   |              | 6(8.00)                     | 18(5.34)    |         |  |  |  |
| Marital status                                  |                |                        |             | 0.131        |                             |             | 0.132   |  |  |  |
| Married                                         | 68(16.50)      | 7(10.29)               | 61(17.73)   |              | 8(10.67)                    | 60(17.80)   |         |  |  |  |
| Unmarried                                       | 344(83.50)     | 61(89.71)              | 283(82.27)  |              | 67(89.23)                   | 277(82.20)  |         |  |  |  |
| Monthly personal income                         |                |                        |             | 0.365        |                             |             | 0.956   |  |  |  |
| 1000~5000 RMB                                   | 201(48.79)     | 36(52.94)              | 165(47.97)  |              | 36(48.00)                   | 165(48.96)  |         |  |  |  |
| 5000~10000 RMB                                  | 139(33.74)     | 18(26.47)              | 121(35.17)  |              | 25(33.33)                   | 114(33.83)  |         |  |  |  |
| ≥10000 RMB                                      | 72(17.48)      | 14(20.59)              | 58(16.86)   |              | 14(18.67)                   | 58(17.21)   |         |  |  |  |
| <b>HIV-related characteristics <sup>a</sup></b> |                |                        |             |              |                             |             |         |  |  |  |
| Sexual role                                     |                |                        |             | <b>0.059</b> |                             |             | 0.826   |  |  |  |



|                                                              |            |           |            |              |           |            |              |  |  |  |
|--------------------------------------------------------------|------------|-----------|------------|--------------|-----------|------------|--------------|--|--|--|
| Mainly “Top”                                                 | 182(44.17) | 27(39.71) | 155(45.06) |              | 31(41.33) | 151(44.81) |              |  |  |  |
| Both of it                                                   | 72(17.48)  | 7(10.29)  | 65(18.90)  |              | 13(17.33) | 59(17.51)  |              |  |  |  |
| Mainly “Bottom”                                              | 158(38.35) | 34(50.00) | 124(36.05) |              | 31(41.33) | 127(37.69) |              |  |  |  |
| Number of male sexual partners in the last month             |            |           |            | 0.103        |           |            | 0.697        |  |  |  |
| 0                                                            | 227(55.10) | 45(66.18) | 182(52.91) |              | 42(56.00) | 185(54.90) |              |  |  |  |
| 1                                                            | 123(29.85) | 17(25.00) | 106(30.81) |              | 24(32.00) | 99(29.38)  |              |  |  |  |
| ≥2                                                           | 62(15.05)  | 6(8.82)   | 56(16.28)  |              | 9(12.00)  | 53(15.73)  |              |  |  |  |
| Self-reported HIV infection status                           |            |           |            | 0.138        |           |            | 0.449        |  |  |  |
| Positive                                                     | 38(9.22)   | 10(14.71) | 28(8.14)   |              | 7(9.33)   | 31(9.20)   |              |  |  |  |
| Negative                                                     | 358(86.89) | 57(83.82) | 301(87.50) |              | 67(89.33) | 291(86.35) |              |  |  |  |
| Unknown                                                      | 16(3.88)   | 1(1.47)   | 15(4.36)   |              | 1(1.33)   | 15(4.45)   |              |  |  |  |
| <b>COVID-19 related knowledge <sup>b</sup></b>               |            |           |            |              |           |            |              |  |  |  |
| I am well informed about the causes of COVID-19              |            |           |            | <b>0.082</b> |           |            | 0.487        |  |  |  |
| Totally disagree                                             | 21(5.10)   | 8(11.76)  | 13(3.78)   |              | 4(5.33)   | 17(5.04)   |              |  |  |  |
| Not quite agree                                              | 40(9.71)   | 11(16.18) | 29(8.43)   |              | 13(17.33) | 27(8.01)   |              |  |  |  |
| Average                                                      | 135(32.77) | 16(23.53) | 119(34.59) |              | 19(25.33) | 116(34.42) |              |  |  |  |
| Quite agree                                                  | 131(31.80) | 17(25.00) | 114(33.14) |              | 23(30.67) | 108(32.05) |              |  |  |  |
| Totally agree                                                | 85(20.63)  | 16(23.53) | 69(20.06)  |              | 16(21.33) | 69(20.47)  |              |  |  |  |
| I am well informed about the transmission routes of COVID-19 |            |           |            | 0.142        |           |            | <b>0.050</b> |  |  |  |
| Totally disagree                                             | 4(0.97)    | 2(2.94)   | 2(0.58)    |              | 2(2.67)   | 2(0.59)    |              |  |  |  |
| Not quite agree                                              | 6(1.46)    | 3(4.41)   | 3(0.87)    |              | 4(5.33)   | 2(0.59)    |              |  |  |  |
| Average                                                      | 57(13.83)  | 9(13.24)  | 48(13.95)  |              | 11(14.67) | 46(13.65)  |              |  |  |  |
| Quite agree                                                  | 180(43.69) | 28(41.18) | 152(44.19) |              | 30(40.00) | 150(44.51) |              |  |  |  |
| Totally agree                                                | 165(40.05) | 26(38.24) | 139(40.41) |              | 28(37.33) | 137(40.65) |              |  |  |  |
| I am well informed about the infectiousness of COVID-19      |            |           |            | 0.644        |           |            | <b>0.084</b> |  |  |  |
| Totally disagree                                             | 5(1.21)    | 2(2.94)   | 3(0.87)    |              | 2(2.67)   | 3(0.89)    |              |  |  |  |
| Not quite agree                                              | 6(1.46)    | 1(1.47)   | 5(1.45)    |              | 1(1.33)   | 5(1.48)    |              |  |  |  |
| Average                                                      | 61(14.84)  | 13(19.12) | 48(13.95)  |              | 17(22.67) | 44(13.06)  |              |  |  |  |

|                                                                                |            |           |            |              |           |            |              |  |  |  |
|--------------------------------------------------------------------------------|------------|-----------|------------|--------------|-----------|------------|--------------|--|--|--|
| Quite agree                                                                    | 174(42.23) | 21(30.88) | 153(44.48) |              | 27(36.00) | 147(43.62) |              |  |  |  |
| Totally agree                                                                  | 166(40.29) | 31(45.59) | 135(39.24) |              | 28(37.33) | 138(40.95) |              |  |  |  |
| I am well informed about the effectiveness of preventive measures for COVID-19 |            |           |            | <b>0.084</b> |           |            | <b>0.088</b> |  |  |  |
| Totally disagree                                                               | 4(0.97)    | 2(2.94)   | 2(0.58)    |              | 2(2.67)   | 2(0.59)    |              |  |  |  |
| Not quite agree                                                                | 3(0.73)    | 1(1.47)   | 2(0.58)    |              | 1(1.33)   | 2(0.59)    |              |  |  |  |
| Average                                                                        | 63(15.29)  | 14(20.59) | 49(14.24)  |              | 16(21.33) | 47(13.95)  |              |  |  |  |
| Quite agree                                                                    | 187(45.39) | 27(39.71) | 160(46.51) |              | 29(38.67) | 158(46.88) |              |  |  |  |
| Totally agree                                                                  | 155(37.62) | 24(35.29) | 131(38.08) |              | 27(36.00) | 128(37.98) |              |  |  |  |
| I am well informed about the effectiveness of cure of COVID-19                 |            |           |            | <b>0.047</b> |           |            | <b>0.054</b> |  |  |  |
| Totally disagree                                                               | 18(4.37)   | 9(13.24)  | 9(2.62)    |              | 8(10.67)  | 10(2.97)   |              |  |  |  |
| Not quite agree                                                                | 32(7.77)   | 6(8.82)   | 26(7.56)   |              | 7(9.33)   | 25(7.42)   |              |  |  |  |
| Average                                                                        | 141(34.22) | 20(29.41) | 121(35.17) |              | 22(29.33) | 119(35.31) |              |  |  |  |
| Quite agree                                                                    | 134(32.52) | 18(26.47) | 116(33.72) |              | 25(33.33) | 109(32.34) |              |  |  |  |
| Totally agree                                                                  | 87(21.12)  | 15(22.06) | 72(20.93)  |              | 13(17.33) | 74(21.96)  |              |  |  |  |
| I am well informed about the reinfection of COVID-19 after cure                |            |           |            | 0.620        |           |            | 0.915        |  |  |  |
| Totally disagree                                                               | 16(3.88)   | 7(10.29)  | 9(2.62)    |              | 7(9.33)   | 9(2.67)    |              |  |  |  |
| Not quite agree                                                                | 42(10.19)  | 9(13.24)  | 33(9.59)   |              | 8(10.67)  | 34(10.09)  |              |  |  |  |
| Average                                                                        | 165(40.05) | 19(27.94) | 146(42.44) |              | 19(25.33) | 146(43.32) |              |  |  |  |
| Quite agree                                                                    | 111(26.94) | 15(22.06) | 96(27.91)  |              | 24(32.00) | 87(25.82)  |              |  |  |  |
| Totally agree                                                                  | 78(18.93)  | 18(26.47) | 60(17.44)  |              | 17(22.67) | 61(18.10)  |              |  |  |  |
| <b>COVID-19 related attitudes <sup>b</sup></b>                                 |            |           |            |              |           |            |              |  |  |  |
| I think COVID-19 is very contagious                                            |            |           |            | 0.893        |           |            | 0.379        |  |  |  |
| Totally disagree                                                               | 3(0.73)    | 1(1.47)   | 2(0.58)    |              | 1(1.33)   | 2(0.59)    |              |  |  |  |
| Not quite agree                                                                | 3(0.73)    | 0(0.00)   | 3(0.87)    |              | 1(1.33)   | 2(0.59)    |              |  |  |  |
| Average                                                                        | 17(4.13)   | 2(2.94)   | 15(4.36)   |              | 3(4.00)   | 14(4.15)   |              |  |  |  |
| Quite agree                                                                    | 58(14.08)  | 10(14.71) | 48(13.95)  |              | 12(16.00) | 46(13.65)  |              |  |  |  |
| Totally agree                                                                  | 331(80.34) | 55(80.88) | 276(80.23) |              | 58(77.33) | 273(81.01) |              |  |  |  |
| I think COVID-19 is very prevalent where I live                                |            |           |            | <b>0.001</b> |           |            | <b>0.017</b> |  |  |  |

|                                                          |            |           |            |                  |           |            |              |  |  |  |
|----------------------------------------------------------|------------|-----------|------------|------------------|-----------|------------|--------------|--|--|--|
| Totally disagree                                         | 77(18.69)  | 9(13.24)  | 68(19.77)  |                  | 13(17.33) | 64(18.99)  |              |  |  |  |
| Not quite agree                                          | 105(25.49) | 9(13.24)  | 96(27.91)  |                  | 13(17.33) | 92(27.30)  |              |  |  |  |
| Average                                                  | 105(25.49) | 21(30.88) | 84(24.42)  |                  | 15(20.00) | 90(26.71)  |              |  |  |  |
| Quite agree                                              | 44(10.68)  | 6(8.82)   | 38(11.05)  |                  | 13(17.33) | 31(9.20)   |              |  |  |  |
| Totally agree                                            | 81(19.66)  | 23(33.82) | 58(16.86)  |                  | 21(28.00) | 60(17.80)  |              |  |  |  |
| I am afraid of COVID-19                                  |            |           |            | <b>0.006</b>     |           |            | 0.237        |  |  |  |
| Totally disagree                                         | 42(10.19)  | 4(5.88)   | 38(11.05)  |                  | 6(8.00)   | 36(10.68)  |              |  |  |  |
| Not quite agree                                          | 52(12.62)  | 5(7.35)   | 47(13.66)  |                  | 11(14.67) | 41(12.17)  |              |  |  |  |
| Average                                                  | 174(42.23) | 24(35.29) | 150(43.60) |                  | 24(32.00) | 150(44.51) |              |  |  |  |
| Quite agree                                              | 74(17.96)  | 20(29.41) | 54(15.70)  |                  | 20(26.67) | 54(16.02)  |              |  |  |  |
| Totally agree                                            | 70(16.99)  | 15(22.06) | 55(15.99)  |                  | 14(18.67) | 56(16.62)  |              |  |  |  |
| I think COVID-19 is very close to me                     |            |           |            | <b>0.002</b>     |           |            | <b>0.036</b> |  |  |  |
| Totally disagree                                         | 19(4.61)   | 1(1.47)   | 18(5.23)   |                  | 2(2.67)   | 17(5.04)   |              |  |  |  |
| Not quite agree                                          | 41(9.95)   | 2(2.94)   | 39(11.34)  |                  | 7(9.33)   | 34(10.09)  |              |  |  |  |
| Average                                                  | 142(34.47) | 21(30.88) | 121(35.17) |                  | 20(26.67) | 122(36.20) |              |  |  |  |
| Quite agree                                              | 106(25.73) | 19(27.94) | 87(25.29)  |                  | 20(26.67) | 86(25.52)  |              |  |  |  |
| Totally agree                                            | 104(25.24) | 25(36.76) | 79(22.97)  |                  | 26(34.67) | 78(23.15)  |              |  |  |  |
| I felt nervous when I went out during the outbreak       |            |           |            | <b>&lt;0.001</b> |           |            | <b>0.001</b> |  |  |  |
| Totally disagree                                         | 74(17.96)  | 5(7.35)   | 69(20.06)  |                  | 6(8.00)   | 68(20.18)  |              |  |  |  |
| Not quite agree                                          | 108(26.21) | 14(20.59) | 94(27.33)  |                  | 18(24.00) | 90(26.71)  |              |  |  |  |
| Average                                                  | 153(37.14) | 26(38.24) | 127(36.92) |                  | 30(40.00) | 123(36.50) |              |  |  |  |
| Quite agree                                              | 43(10.44)  | 12(17.65) | 31(9.01)   |                  | 10(13.33) | 33(9.79)   |              |  |  |  |
| Totally agree                                            | 34(8.25)   | 11(16.18) | 23(6.69)   |                  | 11(14.67) | 23(6.82)   |              |  |  |  |
| The outbreak is considered to be under effective control |            |           |            | <b>0.003</b>     |           |            | <b>0.002</b> |  |  |  |
| Totally disagree                                         | 7(1.70)    | 3(4.41)   | 4(1.16)    |                  | 4(5.33)   | 3(0.89)    |              |  |  |  |
| Not quite agree                                          | 12(2.91)   | 3(4.41)   | 9(2.62)    |                  | 5(6.67)   | 7(2.08)    |              |  |  |  |
| Average                                                  | 63(134)    | 16(23.53) | 47(13.66)  |                  | 15(20.00) | 48(14.24)  |              |  |  |  |
| Quite agree                                              | 134(32.52) | 21(30.88) | 113(32.85) |                  | 20(26.67) | 114(33.83) |              |  |  |  |
| Totally agree                                            | 196(47.57) | 25(36.76) | 171(49.71) |                  | 31(41.33) | 165(48.96) |              |  |  |  |
| I think there will be another small epidemic             |            |           |            | <b>0.029</b>     |           |            | <b>0.065</b> |  |  |  |

|                                                                  |            |           |            |              |           |            |              |  |  |  |
|------------------------------------------------------------------|------------|-----------|------------|--------------|-----------|------------|--------------|--|--|--|
| Totally disagree                                                 | 18(4.37)   | 3(4.41)   | 15(4.36)   |              | 3(4.00)   | 15(4.45)   |              |  |  |  |
| Not quite agree                                                  | 57(13.83)  | 6(8.82)   | 51(14.83)  |              | 6(8.00)   | 51(15.13)  |              |  |  |  |
| Average                                                          | 96(23.30)  | 13(19.12) | 83(24.13)  |              | 18(24.00) | 78(23.15)  |              |  |  |  |
| Quite agree                                                      | 138(33.50) | 20(29.41) | 118(34.30) |              | 22(29.33) | 116(34.42) |              |  |  |  |
| Totally agree                                                    | 103(25.00) | 26(38.24) | 77(22.38)  |              | 26(34.67) | 77(22.85)  |              |  |  |  |
| I think the outbreak will cause me financial losses              |            |           |            | 0.269        |           |            | <b>0.040</b> |  |  |  |
| Totally disagree                                                 | 8(1.94)    | 2(2.94)   | 6(1.74)    |              | 2(2.67)   | 6(1.78)    |              |  |  |  |
| Not quite agree                                                  | 25(6.07)   | 1(1.47)   | 24(6.98)   |              | 1(1.33)   | 24(7.12)   |              |  |  |  |
| Average                                                          | 82(19.90)  | 12(17.65) | 70(20.35)  |              | 9(12.00)  | 73(21.66)  |              |  |  |  |
| Quite agree                                                      | 91(22.09)  | 16(23.53) | 75(21.80)  |              | 20(26.67) | 71(21.07)  |              |  |  |  |
| Totally agree                                                    | 206(50.00) | 37(54.41) | 169(49.13) |              | 43(57.33) | 163(48.37) |              |  |  |  |
| I think COVID-19 can be cured                                    |            |           |            | <b>0.098</b> |           |            | <b>0.066</b> |  |  |  |
| Totally disagree                                                 | 14(3.40)   | 5(7.35)   | 9(2.62)    |              | 4(5.33)   | 10(2.97)   |              |  |  |  |
| Not quite agree                                                  | 16(3.88)   | 3(4.41)   | 13(3.78)   |              | 5(6.67)   | 11(3.26)   |              |  |  |  |
| Average                                                          | 68(16.50)  | 12(17.65) | 56(16.28)  |              | 14(18.67) | 54(16.02)  |              |  |  |  |
| Quite agree                                                      | 111(26.94) | 18(26.47) | 93(27.03)  |              | 20(26.67) | 91(27.00)  |              |  |  |  |
| Totally agree                                                    | 203(49.27) | 30(44.12) | 173(50.29) |              | 32(42.67) | 171(50.74) |              |  |  |  |
| I think it is possible to be reinfected after COVID-19 is cured  |            |           |            | 0.142        |           |            | <b>0.050</b> |  |  |  |
| Totally disagree                                                 | 14(3.40)   | 1(1.47)   | 13(3.78)   |              | 1(1.33)   | 13(3.86)   |              |  |  |  |
| Not quite agree                                                  | 35(8.50)   | 6(8.82)   | 29(8.43)   |              | 6(8.00)   | 29(8.61)   |              |  |  |  |
| Average                                                          | 88(21.36)  | 11(16.18) | 77(22.38)  |              | 8(10.67)  | 80(23.74)  |              |  |  |  |
| Quite agree                                                      | 119(28.88) | 19(27.94) | 100(29.07) |              | 28(37.33) | 91(27.00)  |              |  |  |  |
| Totally agree                                                    | 156(37.86) | 31(45.59) | 125(36.34) |              | 32(42.67) | 124(36.80) |              |  |  |  |
| If I get infected, I will not be able to handle daily activities |            |           |            | <b>0.075</b> |           |            | <b>0.068</b> |  |  |  |
| Totally disagree                                                 | 59(14.32)  | 8(11.76)  | 51(14.83)  |              | 8(10.67)  | 51(15.13)  |              |  |  |  |
| Not quite agree                                                  | 91(22.09)  | 12(17.65) | 79(22.97)  |              | 13(17.33) | 78(23.15)  |              |  |  |  |
| Average                                                          | 98(23.79)  | 16(23.53) | 82(23.84)  |              | 19(25.33) | 79(23.44)  |              |  |  |  |
| Quite agree                                                      | 72(17.48)  | 10(14.71) | 62(18.02)  |              | 13(17.33) | 59(17.51)  |              |  |  |  |
| Totally agree                                                    | 92(22.33)  | 22(32.35) | 70(20.35)  |              | 22(29.33) | 70(20.77)  |              |  |  |  |

|                                                                                                  |            |           |            |              |           |            |              |  |  |  |
|--------------------------------------------------------------------------------------------------|------------|-----------|------------|--------------|-----------|------------|--------------|--|--|--|
| I am very worried about another outbreak                                                         |            |           |            | <b>0.033</b> |           |            | <b>0.065</b> |  |  |  |
| Totally disagree                                                                                 | 16(3.88)   | 2(2.94)   | 14(4.07)   |              | 2(2.67)   | 14(4.15)   |              |  |  |  |
| Not quite agree                                                                                  | 36(8.74)   | 3(4.41)   | 33(9.59)   |              | 4(5.33)   | 32(9.50)   |              |  |  |  |
| Average                                                                                          | 107(25.97) | 17(25.00) | 90(26.16)  |              | 18(24.00) | 89(26.41)  |              |  |  |  |
| Quite agree                                                                                      | 95(23.06)  | 10(14.71) | 85(24.71)  |              | 15(20.00) | 80(23.74)  |              |  |  |  |
| Totally agree                                                                                    | 158(38.35) | 36(52.94) | 122(35.47) |              | 36(48.00) | 122(36.20) |              |  |  |  |
| <b>COVID-19 related behavior <sup>a</sup></b>                                                    |            |           |            |              |           |            |              |  |  |  |
| Had a COVID-19 test                                                                              |            |           |            | 0.902        |           |            | 0.296        |  |  |  |
| Yes                                                                                              | 81(19.66)  | 13(19.12) | 68(19.77)  |              | 18(24.00) | 63(18.69)  |              |  |  |  |
| No                                                                                               | 331(80.34) | 55(80.88) | 276(80.23) |              | 57(76.00) | 274(81.31) |              |  |  |  |
| <b>Risk perception</b>                                                                           |            |           |            |              |           |            |              |  |  |  |
| <b>Controllability <sup>b</sup></b>                                                              |            |           |            |              |           |            |              |  |  |  |
| I can take protective measures such as home isolation, wearing masks and washing hands regularly |            |           |            | 0.240        |           |            | 0.181        |  |  |  |
| Totally disagree                                                                                 | 0(0.00)    | 0(0.00)   | 0(0.00)    |              | 0(0.00)   | 0(0.00)    |              |  |  |  |
| Not quite agree                                                                                  | 2(0.49)    | 1(1.47)   | 1(0.29)    |              | 1(1.33)   | 1(0.30)    |              |  |  |  |
| Average                                                                                          | 27(6.55)   | 6(8.82)   | 21(6.10)   |              | 7(9.33)   | 20(5.93)   |              |  |  |  |
| Quite agree                                                                                      | 59(14.32)  | 10(14.71) | 49(14.24)  |              | 11(14.67) | 48(14.24)  |              |  |  |  |
| Totally agree                                                                                    | 324(78.64) | 51(75.00) | 273(79.36) |              | 56(74.67) | 268(79.53) |              |  |  |  |
| I can ensure that I am not infected with COVID-19                                                |            |           |            | <b>0.037</b> |           |            | <b>0.073</b> |  |  |  |
| Totally disagree                                                                                 | 0(0.00)    | 0(0.00)   | 0(0.00)    |              | 0(0.00)   | 0(0.00)    |              |  |  |  |
| Not quite agree                                                                                  | 8(1.94)    | 2(2.94)   | 6(1.74)    |              | 4(5.33)   | 4(1.19)    |              |  |  |  |
| Average                                                                                          | 69(16.75)  | 18(26.47) | 51(14.83)  |              | 16(21.33) | 53(15.73)  |              |  |  |  |
| Quite agree                                                                                      | 150(36.41) | 22(32.35) | 128(37.21) |              | 24(32.00) | 126(37.79) |              |  |  |  |
| Totally agree                                                                                    | 185(44.90) | 26(38.24) | 159(46.22) |              | 31(41.33) | 154(45.70) |              |  |  |  |
| I can control the loss caused by COVID-19                                                        |            |           |            | 0.532        |           |            | 0.395        |  |  |  |
| Totally disagree                                                                                 | 0(0.00)    | 0(0.00)   | 0(0.00)    |              | 0(0.00)   | 0(0.00)    |              |  |  |  |
| Not quite agree                                                                                  | 51(12.83)  | 8(11.76)  | 43(12.50)  |              | 11(14.67) | 40(11.87)  |              |  |  |  |
| Average                                                                                          | 223(54.13) | 40(58.82) | 183(53.20) |              | 42(56.00) | 181(53.71) |              |  |  |  |
| Quite agree                                                                                      | 59(14.32)  | 9(13.24)  | 50(14.53)  |              | 9(12.00)  | 50(14.84)  |              |  |  |  |

|                                               |            |           |            |              |           |            |              |  |  |  |
|-----------------------------------------------|------------|-----------|------------|--------------|-----------|------------|--------------|--|--|--|
| Totally agree                                 | 79(19.17)  | 11(16.18) | 68(19.77)  |              | 13(17.33) | 66(19.58)  |              |  |  |  |
| <b>Possibility <sup>b</sup></b>               |            |           |            |              |           |            |              |  |  |  |
| I'm very likely to get infected with COVID-19 |            |           |            | 0.906        |           |            | 0.725        |  |  |  |
| Totally disagree                              | 0(0.00)    | 0(0.00)   | 0(0.00)    |              | 0(0.00)   | 0(0.00)    |              |  |  |  |
| Not quite agree                               | 193(46.84) | 30(44.12) | 163(47.38) |              | 31(41.33) | 162(48.07) |              |  |  |  |
| Average                                       | 135(32.77) | 25(36.76) | 110(31.98) |              | 29(38.67) | 106(31.45) |              |  |  |  |
| Quite agree                                   | 29(7.04)   | 4(5.88)   | 25(7.27)   |              | 6(8.00)   | 23(6.82)   |              |  |  |  |
| Totally agree                                 | 55(13.35)  | 9(13.24)  | 46(13.37)  |              | 9(12.00)  | 46(13.65)  |              |  |  |  |
| <b>Susceptibility <sup>b</sup></b>            |            |           |            |              |           |            |              |  |  |  |
| I am more likely than others to get COVID-19  |            |           |            | <b>0.002</b> |           |            | <b>0.005</b> |  |  |  |
| Totally disagree                              | 73(17.72)  | 8(11.76)  | 65(18.90)  |              | 10(13.33) | 63(18.69)  |              |  |  |  |
| Not quite agree                               | 146(35.44) | 16(23.53) | 130(37.79) |              | 15(20.00) | 131(38.87) |              |  |  |  |
| Average                                       | 136(33.01) | 27(39.71) | 109(31.69) |              | 33(44.00) | 103(30.56) |              |  |  |  |
| Quite agree                                   | 28(6.80)   | 11(16.18) | 17(4.94)   |              | 13(17.33) | 15(4.45)   |              |  |  |  |
| Totally agree                                 | 29(7.04)   | 6(8.82)   | 23(6.69)   |              | 4(5.33)   | 25(7.42)   |              |  |  |  |
| <b>Severity <sup>b</sup></b>                  |            |           |            |              |           |            |              |  |  |  |
| I think COVID-19 is very serious              |            |           |            | 0.466        |           |            | <b>0.030</b> |  |  |  |
| Totally disagree                              | 5(1.21)    | 1(1.47)   | 4(1.16)    |              | 2(2.67)   | 3(0.89)    |              |  |  |  |
| Not quite agree                               | 6(1.46)    | 2(2.94)   | 4(1.16)    |              | 2(2.67)   | 4(1.19)    |              |  |  |  |
| Average                                       | 39(9.47)   | 8(11.76)  | 31(9.01)   |              | 10(13.33) | 29(8.61)   |              |  |  |  |
| Quite agree                                   | 93(22.57)  | 13(19.12) | 80(23.26)  |              | 18(24.00) | 75(22.26)  |              |  |  |  |
| Totally agree                                 | 269(65.29) | 44(64.71) | 225(65.41) |              | 43(57.33) | 226(67.06) |              |  |  |  |
| <b>Epidemic exposure <sup>a</sup></b>         |            |           |            | <b>0.024</b> |           |            | <b>0.022</b> |  |  |  |
| Yes                                           | 209(50.73) | 43(63.24) | 166(48.26) |              | 47(62.67) | 162(48.07) |              |  |  |  |
| No                                            | 203(49.27) | 25(36.76) | 178(51.74) |              | 28(37.33) | 175(61.93) |              |  |  |  |

a: Chi-Square Test

b: Trend Chi-Square Test
